# Supplementary material for: Estrogen-dependent activation of NCOA3 couples with p300 and NF-κB to mediate antiapoptotic genes in ER-positive breast cancer cells
Source: PubMed Central journal article supplement (PMC9975134; doi:10.1007/s12672-023-00635-0), 2023-02-28
Supplement: 12672_2023_635_MOESM1_ESM.pdf [file 12672_2023_635_MOESM1_ESM.pdf]

**Figure S1. The quantified protein levels of ER and antiapoptotic proteins in breast cancer cell lines and the mRNA levels of *BCL2L1/2* in clinical ER-negative and ER-positive tumors**

**(A and B)** The quantified protein levels of ER $\alpha$ , ER $\beta$ , and antiapoptotic proteins in breast cancer cell lines. Protein signals in Figure 1C were quantified using Image J software and then normalized to their corresponding loading control (GAPDH). Protein levels in HME1 were defined as one-fold and protein levels in other cells were all compared with those in HME1. **(A)** ER $\alpha$ , ER $\beta$ , Bcl2A1, and Bcl2. **(B)** Mcl1, Bcl-w, and Bcl-xL. Results represented means of three replicates  $\pm$  SD. Significant difference was determined by the One-way ANOVA, followed by Tukey's post-hoc test. ns: no significant difference; \*  $P < 0.05$ , \*\*  $P < 0.01$ , and \*\*\*  $P < 0.001$ . **(C and D)** The mRNA levels of *BCL2L1/2* in ER-negative and

ER-positive tumor samples. The same RNA samples as used in Figure 1D were subjected to detect mRNA levels of *BCL2L2* (**C**) and *BCL2L1* (**D**). Three independent replicates were performed and one group of representative results was shown. Significant difference was determined by the One-way ANOVA, followed by Tukey's post-hoc test. ns: no significant difference; \*\*  $P < 0.01$ .



**Figure S2. Expression levels of four antiapoptotic gene were positively correlated with  $ER\alpha/ER\beta$**

The expression levels of antiapoptotic genes (*BCL2A1*, *BCL2*, *MCL1*, *BCL2L2*, and *BCL2L1*) and  $ER\alpha/ER\beta$  in ER-positive tumor samples (n=102) were used for Pearson's correlation with SPSS software. **(A)** Correlation between *BCL2A1* and  $ER\alpha$ . **(B)** Correlation between *BCL2* and  $ER\alpha$ . **(C)** Correlation between *MCL1* and  $ER\alpha$ . **(D)** Correlation between *BCL2L2* and  $ER\alpha$ . **(E)** Correlation between *BCL2L1* and  $ER\alpha$ . **(F)** Correlation between *BCL2A1* and  $ER\beta$ . **(G)** Correlation between *BCL2* and  $ER\beta$ . **(H)** Correlation between *MCL1* and  $ER\beta$ . **(I)** Correlation between *BCL2L2* and  $ER\beta$ . **(J)** Correlation between *BCL2L1* and  $ER\beta$ . Three independent replicates were performed and one group of representative results was shown.



**Figure S3. E2 treatments dose-dependently induced the mRNA and protein levels of *BCL2A1*, *BCL2*, *MCL1* and *BCL2L2* in HME1, T47D and BT549 cells**

**(A and B)** The mRNA levels of *ERα*, *ERβ*, and antiapoptotic genes in cells treated with or without E2. The HME1, T47D, and BT549 cells were treated with PBS (Ctrl), 5 nM, or 10 nM E2 for 4 h. Total RNA samples from these cells were used for RT-qPCR analyses to measure mRNA levels of genes. **(A)** *ERα*, *ERβ*, *BCL2A1*, and *BCL2*. **(B)** *MCL1*, *BCL2L2*, and *BCL2L1*. The expression levels of these 7 genes in PBS-treated HME1 cells were defined as one-fold and their expression levels in other cell lines were all compared to those in PBS-treated HME1 cells. Three independent replicates ( $n=3$  for each replicate) were performed and results represented means of three replicates  $\pm$  SD. Significant difference was determined by the One-way ANOVA, followed by Tukey's post-hoc test.

ns: no significant difference; \*  $P < 0.05$  and \*\*  $P < 0.01$ . **(C)** The protein levels of ER and antiapoptotic proteins. Total protein extracts from cells in (A) were used for immunoblots to measure the protein levels of ER $\alpha$ , ER $\beta$ , Bcl2A1, Bcl2, Mcl1, Bcl-w, Bcl-xL, and GAPDH (loading control). Three independent replicates were performed. For each lane in a replicate, three independent protein samples were mixed with equal weights (20  $\mu$ g for each). One group of immunoblot images were shown.



**Figure S4. The quantified protein levels of ER and antiapoptotic proteins in HME1, T47D and BT549 cells treated with or without E2**

Protein signals in Figure S3C were quantified using Image J software and then normalized to their corresponding loading control (GAPDH). Protein levels in PBS-treated HME1 (Ctrl) were defined as one-fold and protein levels in other cells were all compared with those in PBS-treated HME1. **(A)** ER $\alpha$ , ER $\beta$ , Bcl2A1, and Bcl2. **(B)** Mcl1, Bcl-w, and Bcl-xL. Results represented means of three replicates  $\pm$  SD. Significant difference was

determined by the One-way ANOVA, followed by Tukey's post-hoc test. ns: no significant difference; \*  $P < 0.05$  and \*\*  $P < 0.01$ .



**Figure S5. E2 treatments dose-dependently induced the mRNA levels of *BCL2A1*, *BCL2*, *MCL1* and *BCL2L2* in HME1, MCF7 and HCC70 cells**

**(A and B)** The mRNA levels of *ERα*, *ERβ*, and antiapoptotic genes in cells treated with or without E2. The HME1, MCF7 and HCC70 cells were treated with PBS (Ctrl), 5 nM, or 10 nM E2 for 4 h. Total RNA samples from these cells were used for RT-qPCR analyses to measure mRNA levels of genes. **(A)** *ERα*, *ERβ*, *BCL2A1*, and *BCL2*. **(B)** *MCL1*, *BCL2L2*, and *BCL2L1*. The expression levels of these 7 genes in PBS-treated HME1 cells

were defined as one-fold and their expression levels in other cell lines were all compared to those in PBS-treated HME1 cells. Three independent replicates (n=3 for each replicate) were performed and results represented means of three replicates  $\pm$  SD. Significant difference was determined by the One-way ANOVA, followed by Tukey's post-hoc test. ns: no significant difference; \*  $P < 0.05$  and \*\*  $P < 0.01$ .



**Figure S6. E2 treatments dose-dependently induced the protein levels of Bcl2A1, and Bcl2. Mcl1, Bcl-w in HME1, MCF7 and HCC70 cells**

**(A)** The protein levels of ER and antiapoptotic proteins. Total protein extracts from cells in Figure S5 were used for immunoblots to measure the protein levels of ER $\alpha$ , ER $\beta$ , Bcl2A1, Bcl2, Mcl1, Bcl-w, Bcl-xL, and GAPDH (loading control). Three independent replicates were performed. For each lane in a replicate, three independent protein samples were mixed with equal weights (20  $\mu$ g for each). One group of immunoblot images were shown. **(B and C)** Quantified protein levels. Protein signals in (A) were quantified using Image J software and then normalized to their corresponding loading control (GAPDH). Protein levels in PBS-treated HME1 (Ctrl) were defined as one-fold and protein levels in other cells were all compared with those in PBS-treated HME1. **(B)** ER $\alpha$ , ER $\beta$ , Bcl2A1, and Bcl2. **(C)** Mcl1, Bcl-w, and Bcl-xL. Results represented means of three

replicates  $\pm$  SD. Significant difference was determined by the One-way ANOVA, followed by Tukey's post-hoc test. ns: no significant difference; \*  $P < 0.05$  and \*\*  $P < 0.01$ .



**Figure S7. The mRNA and protein levels of RelA and NFKB1 in RelA-KD and NFKB1-KD cells in HME1, T47D and BT549 backgrounds**

(A) The mRNA levels of *RelA* and *NFKB1* in Control-KD1/2, RelA-KD1/2 and NFKB1-KD1/2 cells (HME1 background). (B and C) The protein levels of p65 and p50 in Control-KD1/2, RelA-KD1/2 and NFKB1-KD1/2 cells (HME1 background). (B) Western blotting results. (C) Quantified protein levels. (D) The mRNA levels of *RelA* and *NFKB1* in Control-KD1/2, RelA-KD1/2 and NFKB1-KD1/2 cells (T47D background). (E and F) The protein levels of p65 and p50 in Control-KD1/2, RelA-KD1/2 and NFKB1-KD1/2 cells (T47D background). (E) Western blotting results. (F) Quantified protein levels. (G) The mRNA levels of *RelA* and *NFKB1* in Control-KD1/2, RelA-KD1/2 and NFKB1-KD1/2 cells (BT549 background). (H and I) The protein levels of p65 and p50 in Control-KD1/2, RelA-KD1/2 and NFKB1-KD1/2 cells (BT549 background). (H) Western blotting results. (I) Quantified protein levels. For the measurement of mRNA levels in this figure, the expression levels of *RelA* and *NFKB1* genes in Control-KD1 cells in each background were defined as one-fold and their expression levels in other cell lines were all compared to those in Control-KD cells (each background). Three independent replicates (n=3 for each replicate) were performed and results represented means of three replicates  $\pm$  SD. Significant difference was determined by the One-way ANOVA, followed by Tukey's post-hoc test. ns: no significant difference; \*\*  $P < 0.01$ . For immunoblots, three independent replicates were performed. For each lane in a replicate, three independent protein samples were mixed with equal weights (20  $\mu$ g for each). One group of immunoblot images were shown. For quantification of protein levels, protein signals were quantified using Image J software and then normalized to their corresponding loading control (GAPDH). Protein levels in

Control-KD1 cells in each background were defined as one-fold and protein levels in other cells were all compared with those in Control-KD1 (each background). Results represented means of three replicates  $\pm$  SD. Significant difference was determined by the One-way ANOVA, followed by Tukey's post-hoc test. ns: no significant difference; \*\*  $P < 0.01$ .



**Figure S8. The mRNA and protein levels of RelA and NFKB1 in RelA-KD and NFKB1-KD cells in MCF7 and HCC70 backgrounds**

**(A)** The mRNA levels of *RelA* and *NFKB1* in Control-KD1/2, RelA-KD1/2 and NFKB1-KD1/2 cells (MCF7 background). **(B and C)** The protein levels of p65 and p50 in Control-KD1/2, RelA-KD1/2 and NFKB1-KD1/2 cells (MCF7 background). **(B)** Western blotting results. **(C)** Quantified protein levels. **(D)** The mRNA levels of *RelA* and *NFKB1* in Control-KD1/2, RelA-KD1/2 and NFKB1-KD1/2 cells (HCC70 background). **(E and F)** The protein levels of p65 and p50 in Control-KD1/2, RelA-KD1/2 and NFKB1-KD1/2 cells (HCC70

background). **(E)** Western blotting results. **(F)** Quantified protein levels. For the measurement of mRNA levels in this figure, the expression levels of *RelA* and *NFKB1* genes in Control-KD1 cells in each background were defined as one-fold and their expression levels in other cell lines were all compared to those in Control-KD cells (each background). Three independent replicates (n=3 for each replicate) were performed and results represented means of three replicates  $\pm$  SD. Significant difference was determined by the One-way ANOVA, followed by Tukey's post-hoc test. ns: no significant difference; \*\*  $P < 0.01$ . For immunoblots, three independent replicates were performed. For each lane in a replicate, three independent protein samples were mixed with equal weights (20  $\mu$ g for each). One group of immunoblot images were shown. For quantification of protein levels, protein signals were quantified using Image J software and then normalized to their corresponding loading control (GAPDH). Protein levels in Control-KD1 cells in each background were defined as one-fold and protein levels in other cells were all compared with those in Control-KD1 (each background). Results represented means of three replicates  $\pm$  SD. Significant difference was determined by the One-way ANOVA, followed by Tukey's post-hoc test. ns: no significant difference; \*\*  $P < 0.01$ .



ANOVA, followed by Tukey's post-hoc test. ns: no significant difference; \*  $P < 0.05$  and  
\*\*  $P < 0.01$ .



**Figure S10. The expression levels of *BCL2A1*, *BCL2*, *MCL1*, and *BCL2L2* in RelA-KD and NFKB1-KD cells (MCF7 background) treated with or without E2**

The Control-KD1/2, RelA-KD1/2, and NFKB1-KD1/2 cells in MCF7 background were treated with 10 nM E2 or without E2 (used PBS) for 4 h, followed by RNA isolation and RT-qPCR analyses to measure mRNA levels of *BCL2A1* (A), *BCL2* (B), *MCL1* (C), *BCL2L2* (D), and *BCL2L1* (E). The expression levels of these 5 genes in PBS-treated Control-KD1 cells were defined as one-fold and their expression levels in other cell lines/conditions were all compared to those in the PBS-treated Control-KD1 cells. Three independent replicates (n=3 for each replicate) were performed and results represented means of three replicates  $\pm$  SD. Significant difference was determined by the One-way

ANOVA, followed by Tukey's post-hoc test. ns: no significant difference; \*  $P < 0.05$  and  
\*\*  $P < 0.01$ .



**Figure S11. The expression levels of *BCL2A1*, *BCL2*, *MCL1*, and *BCL2L2* in RelA-KD and NFKB1-KD cells (BT549 background) treated with or without E2**

The Control-KD1/2, RelA-KD1/2, and NFKB1-KD1/2 cells in BT549 background were treated with 10 nM E2 or without E2 (used PBS) for 4 h, followed by RNA isolation and RT-qPCR analyses to measure mRNA levels of *BCL2A1* (A), *BCL2* (B), *MCL1* (C), *BCL2L2* (D), and *BCL2L1* (E). The expression levels of these 5 genes in PBS-treated Control-KD1 cells were defined as one-fold and their expression levels in other cell lines/conditions were all compared to those in the PBS-treated Control-KD1 cells. Three independent replicates (n=3 for each replicate) were performed and results represented means of three replicates  $\pm$  SD. Significant difference was determined by the One-way ANOVA, followed by Tukey's post-hoc test. ns: no significant difference.



**Figure S12. The expression levels of *BCL2A1*, *BCL2*, *MCL1*, and *BCL2L2* in RelA-KD and NFKB1-KD cells (HCC70 background) treated with or without E2**

The Control-KD1/2, RelA-KD1/2, and NFKB1-KD1/2 cells in HCC70 background were treated with 10 nM E2 or without E2 (used PBS) for 4 h, followed by RNA isolation and RT-qPCR analyses to measure mRNA levels of *BCL2A1* (A), *BCL2* (B), *MCL1* (C), *BCL2L2* (D), and *BCL2L1* (E). The expression levels of these 5 genes in PBS-treated Control-KD1 cells were defined as one-fold and their expression levels in other cell lines/conditions were all compared to those in the PBS-treated Control-KD1 cells. Three independent replicates (n=3 for each replicate) were performed and results represented means of three replicates  $\pm$  SD. Significant difference was determined by the One-way ANOVA, followed by Tukey's post-hoc test. ns: no significant difference.



**Figure S13. The quantified protein levels of p65, p50, p300 and NCOA3 in HME1, T47D, MCF7, BT549, and HCC70 cells treated with or without E2**

Protein signals in Figure 4A-4C were quantified using Image J software and then normalized to their corresponding loading control (GAPDH). Protein levels in PBS-treated HME1 (Ctrl) (**A**), PBS-treated T47D (Ctrl) (**B**), and PBS-treated BT549 (Ctrl) (**C**) were defined as one-fold and protein levels in other cells were all compared with those in PBS-treated controls. Results represented means of three replicates  $\pm$  SD. Significant difference was determined by the One-way ANOVA, followed by Tukey's post-hoc test. ns: no significant difference; \*  $P < 0.05$  and \*\*  $P < 0.01$ .



**Figure S14. The mRNA and protein levels of RelA, NFKB1, p300 and NCOA3 in their corresponding overexpression cell lines (T47D background)**

**(A)** The mRNA levels of *RelA* and *NFKB1* in Control-OE1/2, RelA-OE1/2 and NFKB1-OE1/2 cells. **(B and C)** The protein levels of p65 and p50 in Control-OE1/2, RelA-OE1/2 and NFKB1-OE1/2 cells. **(B)** Western blotting results. **(C)** Quantified protein levels. **(D)** The mRNA levels of *p300* and *NCOA3* in Control-OE1/2, p300-OE1/2 and NCOA3-OE1/2

cells. **(E and F)** The protein levels of p65 and p50 in Control-OE1/2, p300-OE1/2 and NCOA3-OE1/2 cells. **(E)** Western blotting results. **(F)** Quantified protein levels. **(G)** The mRNA levels of *BCL2A1*, *BCL2*, *MCL1*, *BCL2L2*, and *BCL2L1* in Control-OE1/2, RelA-OE1/2, NFKB1-OE1/2, p300-OE1/2, and NCOA3-OE1/2 cells. For the measurement of mRNA levels in this figure, the expression levels of each gene in Control-OE1 cells were defined as one-fold and their expression levels in other cell lines were all compared to those in Control-OE1 cells. Three independent replicates (n=3 for each replicate) were performed and results represented means of three replicates  $\pm$  SD. Significant difference was determined by the One-way ANOVA, followed by Tukey's post-hoc test. ns: no significant difference; \*\*  $P < 0.01$ . For immunoblots, three independent replicates were performed. For each lane in a replicate, three independent protein samples were mixed with equal weights (20  $\mu$ g for each). One group of immunoblot images were shown. For quantification of protein levels, protein signals were quantified using Image J software and then normalized to their corresponding loading control (GAPDH). Protein levels in Control-OE1 cells were defined as one-fold and protein levels in other cells were all compared with those in Control-OE1. Results represented means of three replicates  $\pm$  SD. Significant difference was determined by the One-way ANOVA, followed by Tukey's post-hoc test. ns: no significant difference; \*\*\*  $P < 0.001$ .



**Figure S15. *NCOA3* was overexpressed in ER-positive tumors and it was positively correlated with four antiapoptotic genes**

**(A)** The mRNA level of *NCOA3* in ER-negative and ER-positive tumor samples. The same RNA samples as used in Figure 1D were used for detection of mRNA levels of *NCOA3*. Three independent replicates were performed and one group of representative results was shown. Significant difference was determined by the One-way ANOVA, followed by Tukey's post-hoc test. \*\*\*  $P < 0.001$ . **(B-H)** Results of Pearson's correlation assays. The expression level of *NCOA3* in ER-positive tumor samples ( $n=102$ ) was used for Pearson's correlation assays with the expression levels of  $ER\alpha$ ,  $ER\beta$ , *BCL2A1*, *BCL2*, *MCL1*, *BCL2L2*, and *BCL2L1* with SPSS software. **(B)** Correlation between *NCOA3* and  $ER\alpha$ . **(C)** Correlation between *NCOA3* and  $ER\beta$ . **(D)** Correlation between *NCOA3* and *BCL2A1*. **(E)** Correlation between *NCOA3* and *BCL2*. **(F)** Correlation between *NCOA3* and *MCL1*. **(G)**

Correlation between *NCOA3* and *BCL2L2*. **(H)** Correlation between *NCOA3* and *BCL2L1*. Three independent replicates were performed and one group of representative results was shown.



**Figure S16. The mRNA and protein levels of p300 and NCOA3 in their corresponding knockdown cell lines under T47D background**

**(A)** The mRNA levels of *NCOA3* and *p300* in Control-KD1/2, NCOA3-KD1/2, and p300-KD1/2 cells (T47D background). The expression levels of *NCOA3* and *p300* in the Control-KD1 cells were defined as one-fold and their expression levels in other cell lines were all compared to that in the Control-KD1 cells. Three independent replicates ( $n=3$  for each replicate) were performed and results represented means of three replicates  $\pm$  SD. Significant difference was determined by the One-way ANOVA, followed by Tukey's post-hoc test. ns: no significant difference; \*\*  $P < 0.01$ . **(B and C)** The protein levels of NCOA3 and p300 in Control-KD1/2, NCOA3-KD1/2, and p300-KD1/2 cells (T47D background). **(B)** Western blotting results. Three independent replicates were performed. For each lane in a replicate, three independent protein samples were mixed with equal weights (20  $\mu$ g for each). One group of immunoblot images were shown. **(C)** Quantified protein levels. protein signals in (B) were quantified using Image J software and then normalized to their

corresponding loading control (GAPDH). Protein levels in Control-KD1 cells were defined as one-fold and protein levels in other cells were all compared with those in Control-KD1. Results represented means of three replicates  $\pm$  SD. Significant difference was determined by the One-way ANOVA, followed by Tukey's post-hoc test. ns: no significant difference; \*\*  $P < 0.01$ .



**Figure S17. The occupancies of NCOA3-p300-NF- $\kappa$ B members on the promoters of *BCL2A1*, *BCL2* and *MCL1* in NCOA3-p300-NF- $\kappa$ B-KD cells treated with or without E2**

The Control-KD1, RelA-KD1, NFKB1-KD1, NCOA3-KD1, and p300-KD1 cells in T47D background were treated with 10 nM E2 or PBS for 4 h. Cells were used for ChIP assays with anti-p65, anti-p50, anti-NCOA3, anti-p300, and IgG-coupled protein G agarose. The input and output DNA samples were used for RT-qPCR analyses to determine the occupancies of NCOA3-p300-NF- $\kappa$ B members on the promoters of *BCL2A1* (**A**), *BCL2* (**B**), and *MCL1* (**C**). Three independent replicates (n=3 for each replicate) were performed and results represented means of three replicates  $\pm$  SD. Significant difference was determined by the One-way ANOVA, followed by Tukey's post-hoc test. ns: no significant difference; \*  $P < 0.05$  and \*\*  $P < 0.01$ .



**Figure S18. The occupancies of NCOA3-p300-NF- $\kappa$ B members on the promoters of *BCL2L1* and *BCL2L2* in NCOA3-p300-NF- $\kappa$ B-KD cells treated with or without E2**

The same input and output DNA samples as in Figure S17 were used for RT-qPCR analyses to determine the occupancies of NCOA3-p300-NF- $\kappa$ B members on the promoters of *BCL2L2* (A) and *BCL2L1* (B). Three independent replicates ( $n=3$  for each replicate) were performed and results represented means of three replicates  $\pm$  SD.

Significant difference was determined by the One-way ANOVA, followed by Tukey's post-hoc test. ns: no significant difference; \*  $P < 0.05$  and \*\*  $P < 0.01$ .



**Figure S19. Deficiency of NCOA3-p300-NF- $\kappa$ B members inhibited breast cancer cell proliferation and invasion**

(A) Representative images of colony formation. The Control-KD1, p65-KD1, p50-KD1, p300-KD1, and NCOA3-KD1 cells in T47D background were seeded into 6-well plates at

a density of  $1 \times 10^3$  cells/well in 2 mL DMEM containing 10% charcoal stripped FBS and 10 nM E2 (or PBS for control). Cell colonies were fixed with 5% glutaraldehyde at 37°C for 10 min, followed by staining with 0.1% crystal violet. Three independent replicates (n=3 for each replicate) were performed and one group of images were shown. **(B)** Representative images of cell invasion. The same cells as in (A) were seeded in the upper compartment of the Nunc Polycarbonate Cell Culture Inserts at a density of  $1 \times 10^5$  cells/well in the conditions of 10 nM E2 and PBS (control). After incubation at 37°C for 48 h, invaded cells in the lower insert were fixed with 5% glutaraldehyde and stained with 0.1% crystal violet. Three independent replicates (n=3 for each replicate) were performed and one group of images were shown. Bars=50  $\mu$ m.



**Figure S20. The protein levels of NCOA3-p300-NF- $\kappa$ B members, five antiapoptotic proteins and three apoptotic marker proteins in NCOA3-p300-NF- $\kappa$ B-KD cells treated with or without E2**

The Control-KD1, RelA-KD1, NFKB1-KD1, NCOA3-KD1, and p300-KD1 cells in T47D background were treated with 10 nM E2 or PBS for 4 h, followed by protein isolation and immunoblot assays to examine protein levels of p65, p50, NCOA3, p300, Bcl2A1, Bcl2, Mcl1, Bcl-w, Bcl-xL Bak, Bax, Caspase-9 (F: full length; C: cleaved length), and GAPDH (loading control). Three independent replicates were performed. For each lane in a

replicate, three independent protein samples were mixed with equal weights (20  $\mu\text{g}$  for each). One group of immunoblot images were shown.



**Figure S21. Gossypol and bufalin dose-dependently inhibited NCOA3 protein level**

**(A)** The chemical structures of two NCOA3 inhibitors (gossypol and bufalin). **(B and C)** NCOA3 protein level in gossypol-treated cells. T47D cells were treated with PBS (Ctrl), 1, 2.5, 5 and 10  $\mu\text{M}$  gossypol for 6 h, followed by examination of NCOA3 and GAPDH protein levels. **(B)** Immunoblot results. **(C)** Quantified protein levels. **(D and E)** NCOA3 protein level in bufalin-treated cells. T47D cells were treated with PBS (Ctrl), 25, 50, 100 and 200 nM bufalin for 6 h, followed by examination of NCOA3 and GAPDH protein levels. **(D)** Immunoblot results. **(E)** Quantified protein levels. For immunoblots, three independent replicates were performed. For each lane in a replicate, three independent protein samples were mixed with equal weights (20  $\mu\text{g}$  for each). One group of immunoblot

images were shown. For quantification of protein levels, protein signals were quantified using Image J software and then normalized to their corresponding loading control (GAPDH). Protein levels in PBS-treated T47D cells were defined as one-fold and protein levels in other cells were all compared with those in PBS-treated T47D cells. Results represented means of three replicates  $\pm$  SD. Significant difference was determined by the One-way ANOVA, followed by Tukey's post-hoc test. \*  $P < 0.05$ .



**Figure S22. Treatments with gossypol and bufalin decreased the occupancy of NCOA3 on the promoters of *BCL2A1*, *BCL2* and *MCL1* T47D cells treated with or without E2**

The T47D cells were treated with PBS, 5  $\mu$ M gossypol and 100 nM bufalin for 6 h, followed by treatment with 10 nM E2 or PBS for 4 h. Cells were used for ChIP assays with anti-NCOA3 and IgG-coupled protein G agarose. The input and output DNA samples were used for RT-qPCR analyses to determine the occupancy of NCOA3 on the promoters of *BCL2A1* (A), *BCL2* (B), *MCL1* (C), *BCL2L2* (D), and *BCL1L1* (E). Three independent replicates (n=3 for each replicate) were performed and results represented means of three replicates  $\pm$  SD. Significant difference was determined by the One-way ANOVA, followed by Tukey's post-hoc test. ns: no significant difference; \*  $P < 0.05$  and \*\*  $P < 0.01$ .



**Figure S23. Gossypol and bufalin inhibited breast cancer cell proliferation, invasion, and in vivo tumor growth**

**(A)** Cell viability. The T47D cells were used for MTT assay in the conditions of PBS, PBS+10 nM E2, 5  $\mu$ M gossypol, 5  $\mu$ M gossypol +10 nM E2, 100 nM bufalin, and 100 nM bufalin+10 nM E2 at different time points (0, 1, 2, 3, 4, and 5 days). Three independent replicates (n=3 for each replicate) were performed and results represented means of three replicates  $\pm$  SD. Significant difference was determined by the One-way ANOVA,

followed by Tukey's post-hoc test. At each time point, comparisons of T47D vs. T47D+10 nM E2 (red asterisks); T47D vs. 100 nM bufalin; T47D vs. 5  $\mu$ M gossypol; 100 nM bufalin vs. 100 nM bufalin+10 nM E2; and 5  $\mu$ M gossypol vs. 5  $\mu$ M gossypol+10 nM E2. The statistical differences between T47D vs. 100 nM bufalin and T47D vs. 5  $\mu$ M gossypol were similar. Only one set of statistical difference (green asterisks) is shown due to the overlapped curves. The statistical differences between 100 nM bufalin vs. 100 nM bufalin+10 nM E2 and 5  $\mu$ M gossypol vs. 5  $\mu$ M gossypol+10 nM E2 were similar. Only one set of statistical difference (purple asterisks) is shown due to the overlapped curves. \*  $P < 0.05$  and \*\*  $P < 0.01$ . **(B)** Colony numbers. Cells in (A) were used for colony formation assay. **(C)** Invaded cell numbers. Cells in (A) were used for cell invasion assay. For experiments in (B) and (C), three independent replicates ( $n=3$  for each replicate) were performed and results represented means of three replicates  $\pm$  SD. Significant difference was determined by the One-way ANOVA, followed by Tukey's post-hoc test. \*  $P < 0.05$ . **(D)** Tumor volumes. T47D cells were injected into female nude mice ( $n=60$  for each cell line), followed by implantation with or without 0.18 mg E2 pellet. Mice were randomly grouped into three groups (Control, gossypol, and bufalin) when tumor volumes reached  $\sim 150$  mm<sup>3</sup>. The Control group mice were injected with PBS. The gossypol groups of mice were injected with 50 mg/kg gossypol and the bufalin groups of mice were injected with 1.5 mg/kg bufalin. Tumor volumes were measured at 5-day intervals for 30 days. Three independent replicates ( $n=10$  for each replicate) were performed and results represented means of three replicates  $\pm$  SD. Significant difference was determined by the One-way ANOVA, followed by Tukey's post-hoc test. At each time point, comparisons of T47D vs. T47D+0.18 mg E2 (red asterisks); T47D vs. 1.5 mg/kg bufalin; T47D vs. 50 mg/kg

gossypol; 1.5 mg/kg bufalin vs. 1.5 mg/kg bufalin+0.18 mg E2; and 50 mg/kg gossypol vs. 50 mg/kg gossypol+0.18 mg E2 were performed. The statistical differences between T47D vs. 1.5 mg/kg bufalin; T47D vs. 50 mg/kg gossypol were similar. Only one set of statistical difference (green asterisks) is shown due to the overlapped curves. The statistical differences between 1.5 mg/kg bufalin vs. 1.5 mg/kg bufalin+0.18 mg E2; and 50 mg/kg gossypol vs. 50 mg/kg gossypol+0.18 mg E2 were similar. Only one set of statistical difference (purple asterisks) is shown due to the overlapped curves. \*  $P < 0.05$  and \*\*  $P < 0.01$ .



**Figure S24. Gossypol and Bufalin inhibited breast cancer cell proliferation and invasion**

**(A)** Representative images of colony formation. T47D cells were grown in the conditions of PBS, PBS+10 nM E2, 5  $\mu$ M gossypol, 5  $\mu$ M gossypol +10 nM E2, 100 nM bufalin, and 100 nM bufalin+10 nM E2 at a density of  $1 \times 10^3$  cells/well in 2 mL DMEM containing 10% charcoal stripped FBS. Cell colonies were fixed with 5% glutaraldehyde at 37°C for 10 min, followed by staining with 0.1% crystal violet. Three independent replicates (n=3 for each replicate) were performed and one group of images were shown. **(B)** Representative images of cell invasion. The same cells as in (A) were seeded in the upper compartment of the Nunc Polycarbonate Cell Culture Inserts at a density of  $1 \times 10^5$  cells/well in the conditions of 10 nM E2 and PBS (control). After incubation at 37°C for 48 h, invaded cells in the lower insert were fixed with 5% glutaraldehyde and stained with 0.1% crystal violet. Three independent replicates (n=3 for each replicate) were performed and one group of images were shown. Bars=50  $\mu$ m.
